# Supplementary material
Source: Springer Nature journal article supplement (https://www.springermedizin.de/resource/supplementary/12916_2012_718_MOESM6_ESM.pdf/9598740)

**a****CX3CR1<sup>+</sup>/GFP**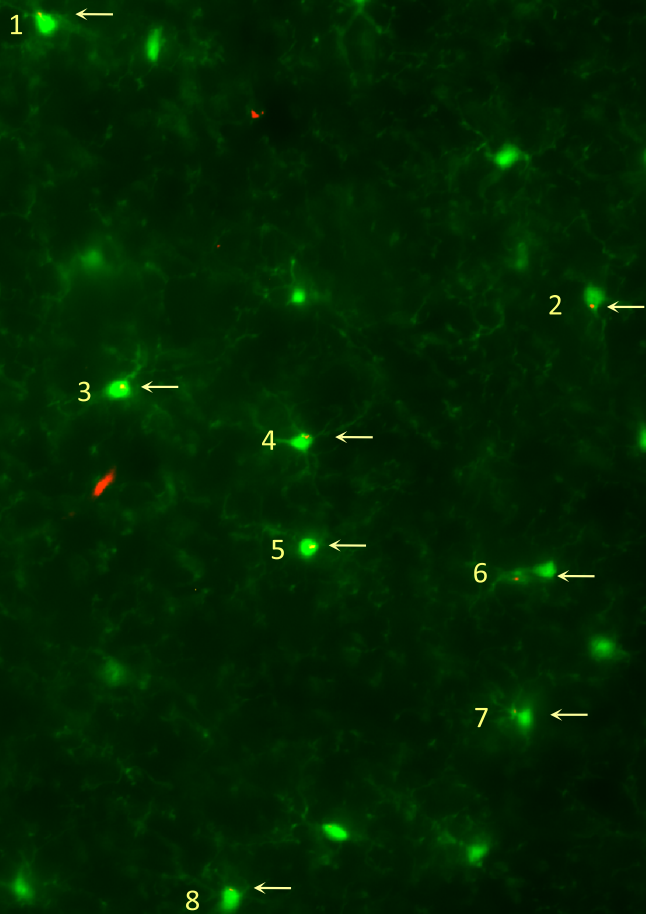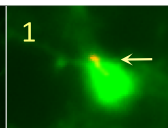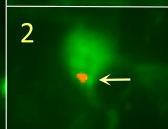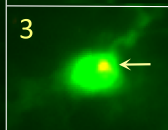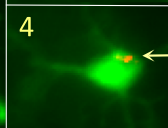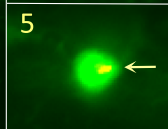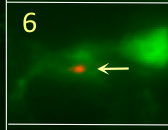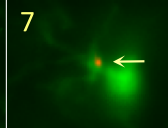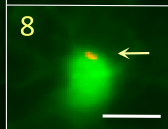**b**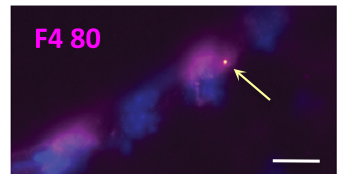**c**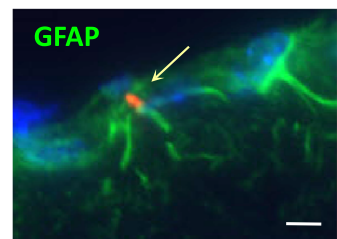**d**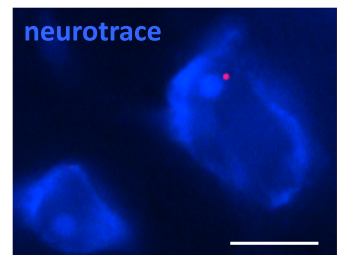**e**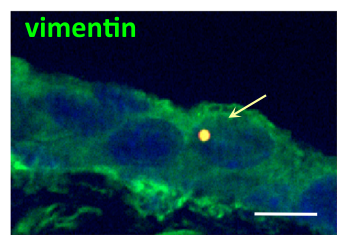

Supplement: MOESM6 [file 9598740]
